# Supplementary material
Source: PubMed Central journal article supplement (PMC3195613)
Supplement: supp_M111.265124_jbc.M111.265124-1.pdf [file supp_M111.265124_jbc.M111.265124-1.pdf]

R Y G D L A S L H G A G A A G P G S G S  
 ccctcagccgcccgttcctcctcatcctggcacactctcttcacagccgaagaaggccagttg  
 P S A A A S S S W H T L F T A E E G Q L  
 tatggaccgtgtggtggtggtgggggtggtggcggcggcggcggcggcggcggcggcggc  
 Y G P C G G G G G G G G G G G G G G G G G G G G G G G G G G G G G  
 ggcggcggcggcggcggcggcggcggcggcggcggcggcggcggcggcggcggcggcggcggc  
 G G G E A G A V A P Y G Y T R P P Q G L  
 gcggggccaggaaagcgcacttcaccgcacctgatgtgtggtaccctggcggcatggtgagc  
 A G Q E S D F T A P D V W Y P G G M V S  
 agagtgcctatcccagtcctcacttgtgtcaaaagcgaaatgggcccctggatggatagc  
 R V P Y P S P T C V K S E M G P W M D S  
 tactccggaccttacggggacatgcgaaatacccgaagaagagactctggaaactcatt  
 Y S G P Y G D M R **N T R R K R L W K L I**  
**I R S I N S C I C S P R E T E V P V R Q**  
 cagaaatgattgcactattgataaattccgaaggaaaaattgtccatcttgtcgtcttcg  
**Q K** -  
 gaaatgttatgaagcagggatgactctgggagaaaaattccgggttggcaattgcaagca  
 tctcaaaatgaccagaccctgaagaaaggctgacttgcctcattcaaaatgagggtctca  
 gagggctctagtggatagctctggagaaacctggcgtctgaggcttaggagcttaggttt  
 tgctcctcaacacagactttgacgttgggggttgggggctactctcttgattgctgactcc  
 ctccagcgggaccaatagtgttttctacctcacagggatgttgtgaggacgggctgtag  
 aagtaatagtggttaccactcatgtagtgtgagtatcatgattattgtttcctgtaatg  
 tggcttggcattggcgaagtgtttttgattgttcttgatcacatatgatggggggccagg  
 cactgactcaggcggatgcagtgaagctctggctcagtcgcttgcttttcgtggtgtgct  
 gccaggaagaaactttgctgatgggactcaagggtgcaccttgacaagaagcaactgtg  
 tctgtctgaggttctgtggccatctttatgtgtattaggcaattcgtatctcccct  
 taggttctagccttctggatcccagccagtgacctagatcttagcctcaggccctgtcac  
 tgagctgaaggtagtagctgatccacagaagttcagtaacaaggaccagatttctgctt  
 ctccaggagaagaagccagccaacctctcttcaaacacactgagagactacagtccga  
 ctttccctcttacatctagccttactgtagccacactccttgattgctctctcacatcac  
 atgcttctcttcatcagttgtaagcctctcattcttctcccaagccagactcaaatattg  
 tattgatgtcaaagaagaatcacttagagtttggaaatcttgttctctctctgctccat  
 agcttccatattgacaccagtttcttcttagtgaggagaagtggagtctgtgaagccaggga  
 aacacacatgtgagagtcagaaggactctccctgacttgcctggggcctgtcttcccac  
 ctctcagctctgtctctaaacacacacacacacacacacacacacacacacacacacac  
 acgctctctctctctctctcccccccaacacacacacactctctctctcacacacacacac  
 atacacacacacttcttctcttccccctgactcagcaacattctggagaaaagccaagg  
 aaggacttcaggaggggagtttcccccttctcagggcagaattttaactctccagaccaac  
 aagaagttccctaattgtggattgaaaggctaattgaggttatttttaactacttctatt  
 tgtttgaatgttgcatatttctactagtgaattttccctt**aataaa**gccattaatacac  
 ccaaaaaaaaaaaaaaaaaa

Note: The stop codons upstream of and in-frame with the first putative methionine is in red and underlined. The termination codon is indicated by “-”, and the polyadenylation signal is in red and underlined. The AR8 unique amino acids are in bold and underlined.

**A**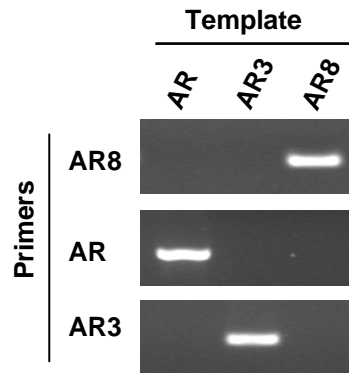**B**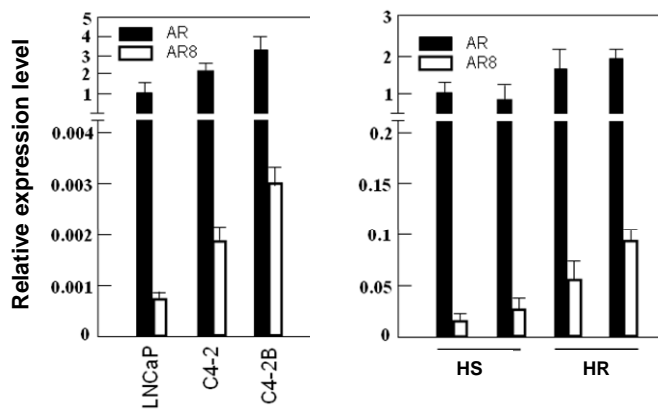**C**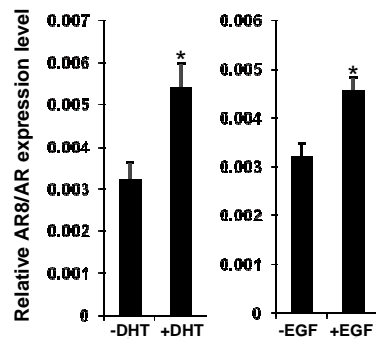**Supplementary Figure 2**

**A**, Specificity of AR8 PCR primers. 10ng of AR, AR3 and AR8 plasmid were used as the PCR template respectively. PCR amplification was carried out using a pair of AR, AR3 or AR8 specific primers as described in the Method. **B**, Relative expression levels of AR and AR8 transcripts in LNCaP, C4-2 and C4-2B (Left) and two pairs of hormone-sensitive (HS) and hormone-resistant (HR) CW22R xenograft tumors were quantified using real-time PCR (Right). **C**, CWR-R1 cells were treated with vehicle or 1nM DHT (Left) or 10 ng/ml EGF (Right) for 12h. The relative expression of AR8 and AR transcript was quantified by real-time RT-PCR. The ratio of AR8 to AR was calculated by using the Pfaffl method. Statistical analysis was performed using a two-tailed Student's t-test. \*,  $p < 0.05$  compared to the untreated control.

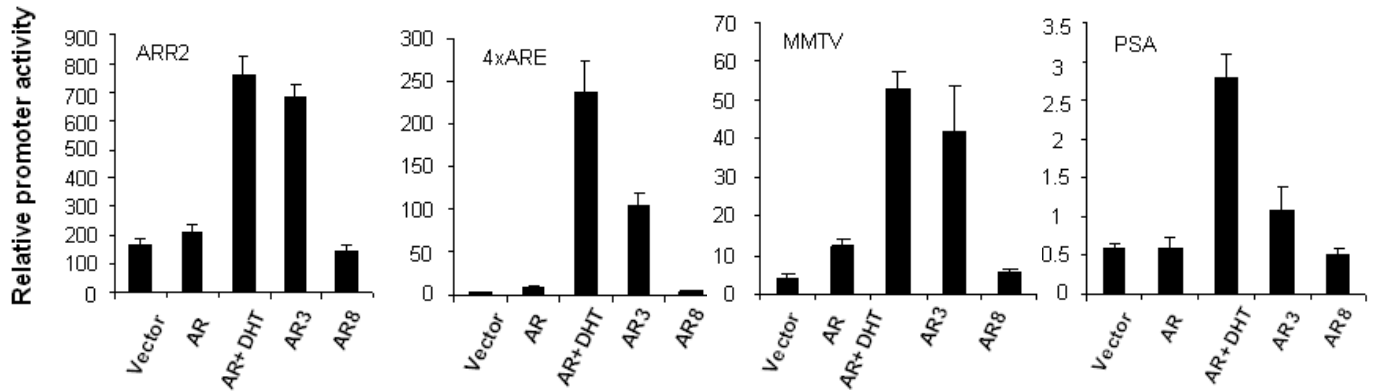

### Supplementary Figure 3

AR8 did not display detectable transcriptional activity. COS-1 cells were transfected with ARR2-luciferase/4xARE-luciferase/MMTV-luciferase/PSA-luciferase reporters along with AR, AR3, AR8, control vector as indicated. At 24 h post-transfection, cells were treated with DHT or vehicle as indicated for 12h before measuring luciferase activity.

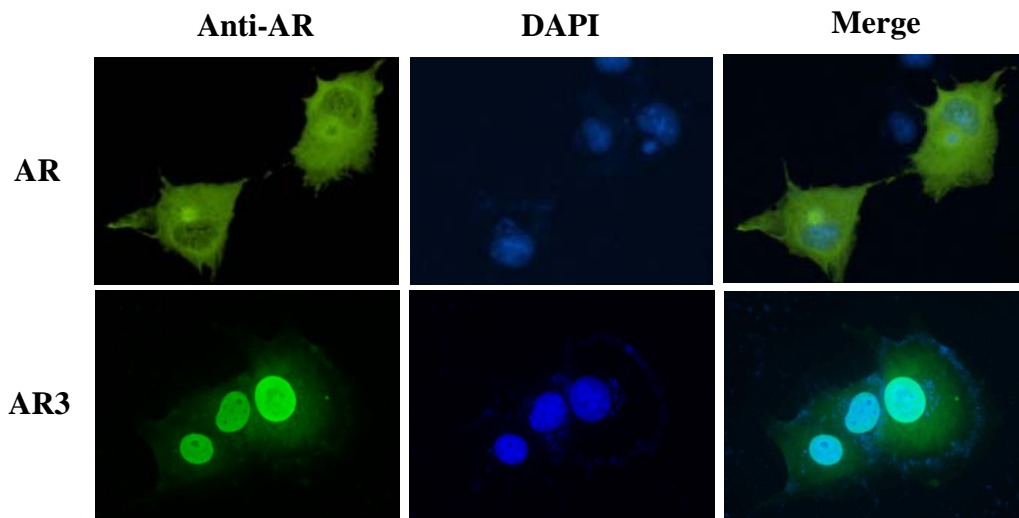

**Supplementary Figure 4** COS-1 cells were transfected with AR or AR3 and stained as described in Fig 1D.

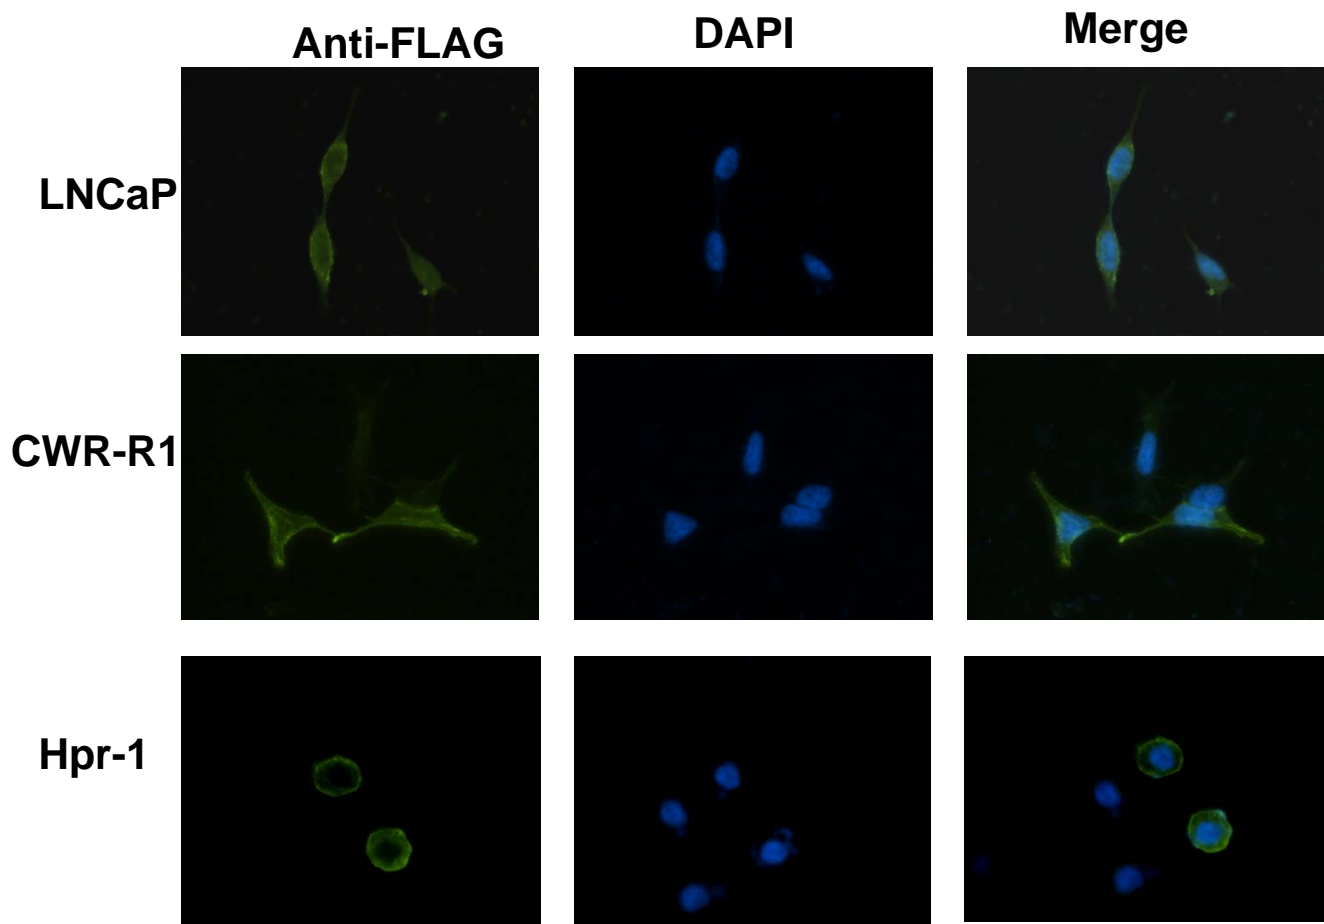

**Supplementary Figure 5**

**Membrane localization of AR8 in prostate cells.** LNCaP, CWR-R1 or Hpr-1 cells were infected with lentivirus encoding FLAG-tagged AR8 and stained as Fig 1D.

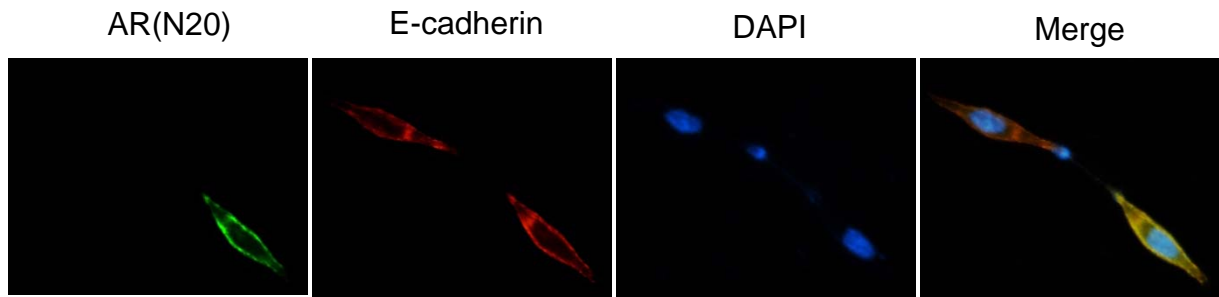

**Supplementary Figure 6**

LNCaP cells were infected with lentivirus encoding AR8 and staining with anti-AR (N20) and anti-E-cadherin antibody. Nucleus was visualized using DAPI staining.

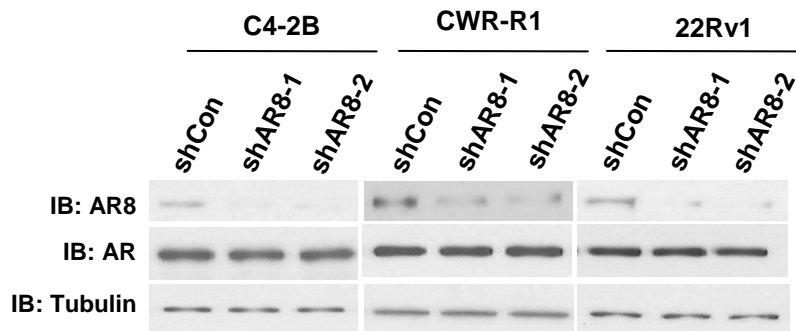

**Supplementary Figure 7**

The expression level of AR and AR8 protein in the cells used for proliferation assays described in Fig. 5A was determined by Western blot.

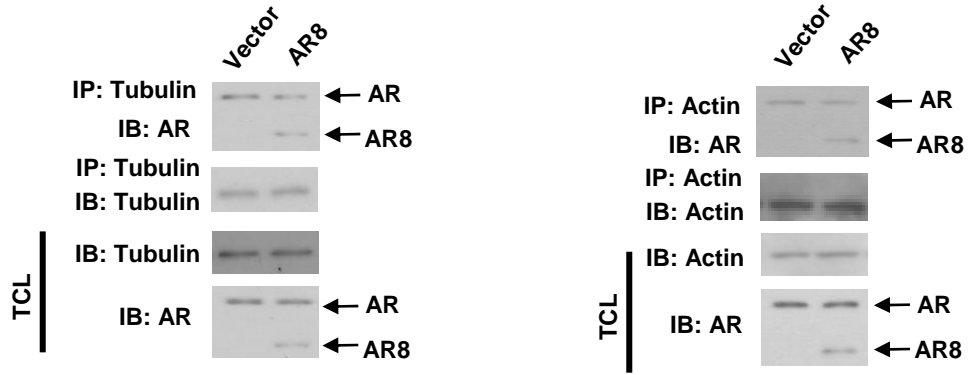

### Supplementary Figure 8

LNCap cells were infected with lentivirus encoding AR8 or control vector. At 48h post-infection, cells lysates were subject to immunoprecipitation with anti-tubulin(left) or anti-Actin(right), followed by Western blot using the indicated antibodies.
